# Supplementary material
Source: PubMed Central journal article supplement (PMC6875901)
Supplement: bgz128_suppl_supplementary_figure_1.pdf [file bgz128_suppl_supplementary_figure_1.pdf]

| <b>GENE</b>    | <b>DM</b>     | <b>Direction</b> |
|----------------|---------------|------------------|
| <b>B3GAT1</b>  | <b>0.056</b>  | <b>UP</b>        |
| <b>CD248</b>   | <b>0.03</b>   | <b>UP</b>        |
| <b>IGFALS</b>  | <b>0.04</b>   | <b>UP</b>        |
| <b>PTGES</b>   | <b>0.006</b>  | <b>UP</b>        |
| <b>SULT1A2</b> | <b>0.03</b>   | <b>UP</b>        |
| <b>TEK</b>     | <b>0.02</b>   | <b>UP</b>        |
| <b>VSIG2</b>   | <b>0.006</b>  | <b>UP</b>        |
| <b>WFIKKN2</b> | <b>0.033</b>  | <b>UP</b>        |
| <b>FOXD3</b>   | <b>-0.013</b> | <b>Down</b>      |
| <b>GSC</b>     | <b>-0.005</b> | <b>Down</b>      |
| <b>TBX15</b>   | <b>-0.167</b> | <b>Down</b>      |

**Supplementary Figure 1**
