# Supplementary material
Source: PubMed Central journal article supplement (PMC6875901)
Supplement: bgz128_suppl_supplementary_table_1.pdf [file bgz128_suppl_supplementary_table_1.pdf]

**Supplementary Table 1. Patient characteristics of bladder specimens**

**RRBS and SAM, SAH, Glucuronic acid, Methyl cytosine, Cytosine, Hydroxy methyl cytosine**

|                       |               |
|-----------------------|---------------|
| <b>Race/ethnicity</b> | AA (n=4)      |
|                       | EA (n=4)      |
| <b>Stage</b>          | T2 (n=4)      |
|                       | T3 (n=2)      |
|                       | T4 (n=2)      |
| <b>Smoking status</b> | Smokers (n=8) |
| <b>Gender</b>         | Male (n=5)    |
|                       | Female (n=3)  |
| <b>Cohorts</b>        | AU (n=8)      |
