# Supplementary material
Source: PubMed Central journal article supplement (PMC6875901)
Supplement: bgz128_suppl_supplementary_table_2.pdf [file bgz128_suppl_supplementary_table_2.pdf]

**Supplementary Table 2. Patient characteristics of bladder specimens**

|                       | <b>RNA sequence (Figure 2C)</b> | <b>Metabolomics (Figure 4A)</b> |
|-----------------------|---------------------------------|---------------------------------|
| <b>Race/ethnicity</b> | AA (n=26)                       | AA (n=13)                       |
|                       | EA (n=32)                       | EA (n=9)                        |
| <b>Stage</b>          | Ta/Tis (n=8)                    | Ta (n=3)                        |
|                       | T1 (n=4)                        | T1 (n=5)                        |
|                       | T2 (n=17)                       | T2 (n=3)                        |
|                       | T3 (n=8)                        | T3 (n=1)                        |
|                       | T4 (n=11)                       | T4 (n=2)                        |
|                       | Unknown (n=10)                  | Unknown (n=8)                   |
| <b>Gender</b>         | Male (n=41)                     | Male (n=18)                     |
|                       | Female (n=10)                   | Female (n=4)                    |
|                       | N/A (n=7)                       |                                 |
| <b>Cohorts</b>        | AU (n= 36 )                     | BCM (n= 22 )                    |
|                       | UTSW (n= 15)                    |                                 |
|                       | BCM (n=7)                       |                                 |
