# Supplementary material
Source: PubMed Central journal article supplement (PMC6875901)

## AA BLCA

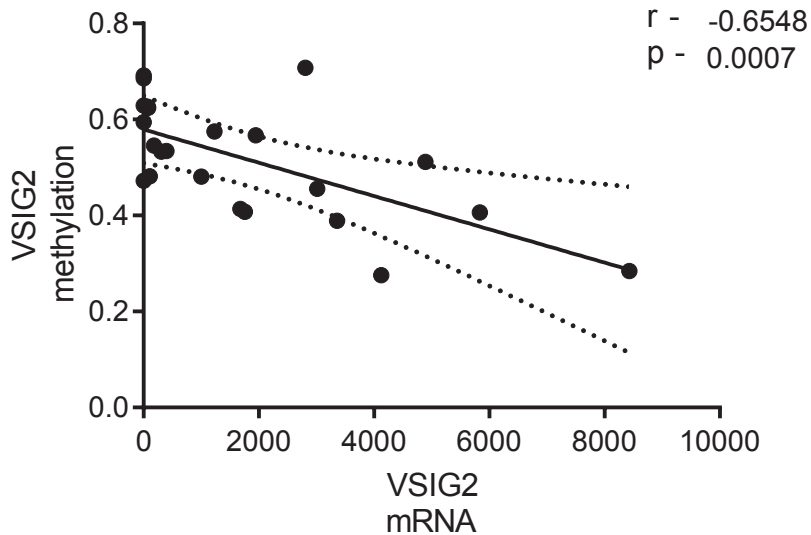

## EA BLCA

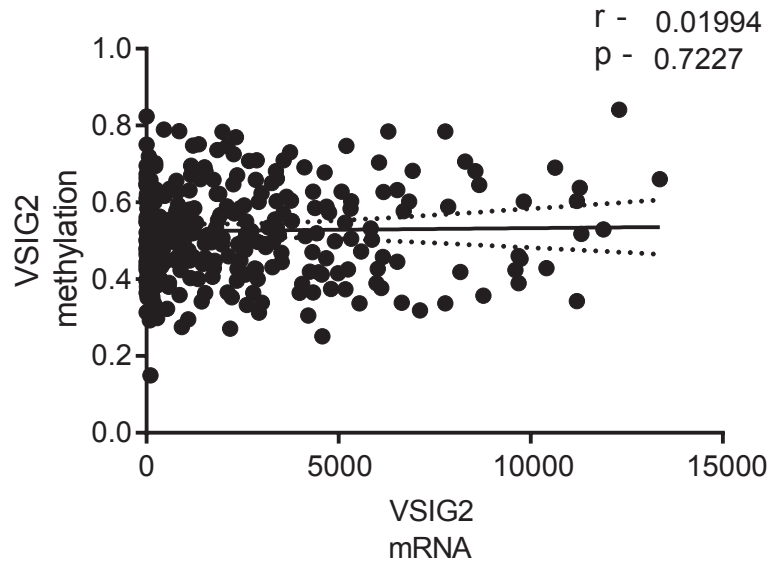

## AA BLCA

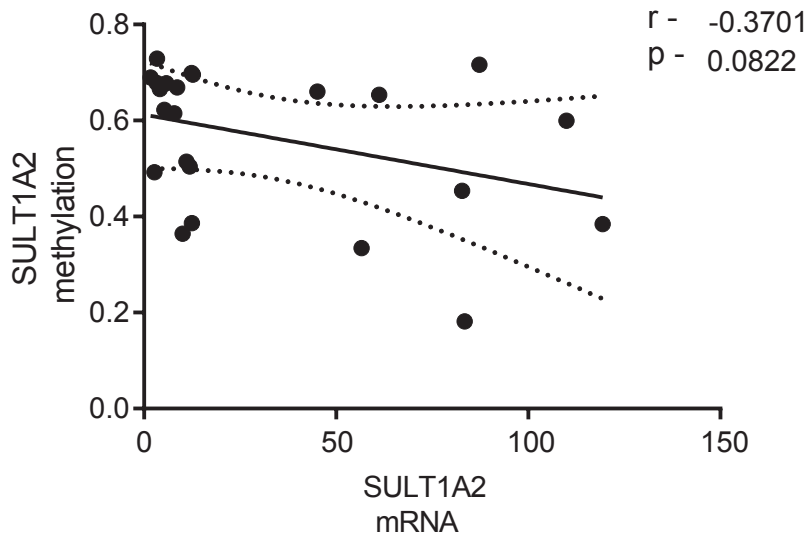

## EA BLCA

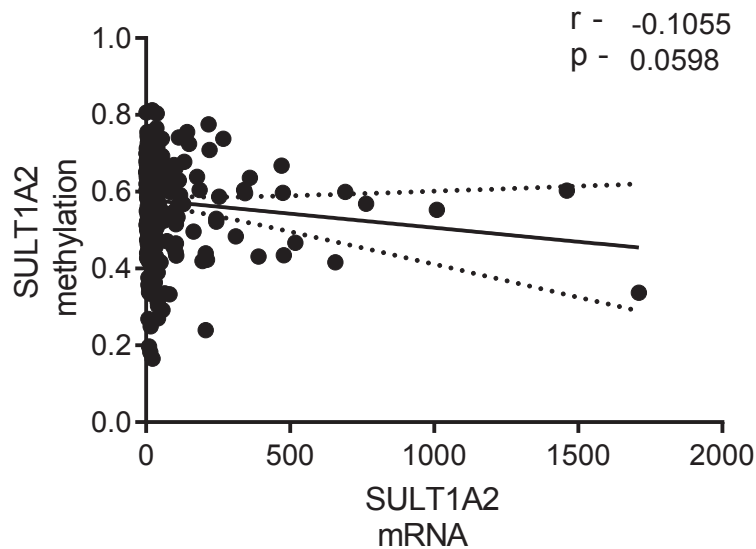

Supplement: bgz128_suppl_supplementary_figure_2.pdf [file bgz128_suppl_supplementary_figure_2.pdf]
